RESEARCH ARTICLE

# *In Vivo* Profiling Reveals a Competent Heat Shock Response in Adult Neurons: Implications for Neurodegenerative Disorders

Alisia Carnemolla<sup>1</sup>, Hayley Lazell<sup>1</sup>, Saliha Moussaoui<sup>2\*</sup>, Gillian P. Bates<sup>1\*</sup>

**1** Dept. Medical and Molecular Genetics, King's College London, 8th Floor Tower Wing, Guy's Hospital, Great Maze Pond, London, SE1 9RT, United Kingdom, **2** Novartis Institute for Biomedical Science, Neuroscience Discovery, Basel, CH-4002, Switzerland

✉ Current address: Rhenovia Pharma, 20C rue Chemnitz, F-68200, Mulhouse, France

\* [gillian.bates@kcl.ac.uk](mailto:gillian.bates@kcl.ac.uk)

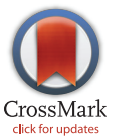

**OPEN ACCESS**

**Citation:** Carnemolla A, Lazell H, Moussaoui S, Bates GP (2015) *In Vivo* Profiling Reveals a Competent Heat Shock Response in Adult Neurons: Implications for Neurodegenerative Disorders. PLoS ONE 10(7): e0131985. doi:10.1371/journal.pone.0131985

**Editor:** Xiao-Jiang Li, Emory University, UNITED STATES

**Received:** April 29, 2015

**Accepted:** June 9, 2015

**Published:** July 2, 2015

**Copyright:** © 2015 Carnemolla et al. This is an open access article distributed under the terms of the [Creative Commons Attribution License](https://creativecommons.org/licenses/by/4.0/), which permits unrestricted use, distribution, and reproduction in any medium, provided the original author and source are credited.

**Data Availability Statement:** All relevant data are within the paper and its Supporting Information files.

**Funding:** This work was funded by the Medical Research Council (G0801314). Novartis provided support in the form of salary for author SM, but did not have any additional role in the study design, data collection and analysis, decision to publish, or preparation of the manuscript. The specific role of this author is articulated in the 'author contributions' section.

## Abstract

The heat shock response (HSR) is the main pathway used by cells to counteract proteotoxicity. The inability of differentiated neurons to induce an HSR has been documented in primary neuronal cultures and has been proposed to play a critical role in ageing and neurodegeneration. However, this accepted dogma has not been demonstrated *in vivo*. We used BAC transgenic mice generated by the Gene Expression Nervous System Atlas project to investigate the capacity of striatal medium sized spiny neurons to induce an HSR as compared to that of astrocytes and oligodendrocytes. We found that all cell populations were competent to induce an HSR upon HSP90 inhibition. We also show the presence and relative abundance of heat shock-related genes and proteins in these striatal cell populations. The identification of a competent HSR in adult neurons supports the development of therapeutics that target the HSR pathway as treatments for neurodegenerative disorders.

## Introduction

The function and plasticity of specific cells relies on a distinctive proteome which is constantly challenged by intrinsic and environmental stresses. Hyperthermia represents one such stress, and heat-related pathologies, such as heat stroke, have been estimated to become one of the most serious causes of human mortality [1]. During heat stroke, a core body temperature of over 40°C causes acute tissue injury coupled with inflammatory and coagulation responses [2], leading to multi-organ failure which is often fatal [3]. This is commonly associated with permanent neurological damage in heat stroke survivors suggesting that the nervous system is particularly vulnerable [4]. Protein homeostasis (proteostasis) is critical for maintaining organismal viability and cell function. Protection against proteotoxicity involves four main stress response pathways: the heat shock response (HSR) [5], the unfolded protein response in the endoplasmic reticulum [6], the unfolded protein response in the mitochondria [7] and the oxidative stress response [8]. These stress pathways together with the ubiquitin proteasome system and

**Competing Interests:** Saliha Moussaoui was an employee of Novartis and is now an employee of Rhenovia Pharma. This does not alter the authors' adherence to PLOS ONE policies on sharing data and materials.

autophagy represent the proteostasis network [9]. The inability of differentiated neurons to induce a heat shock response after hyperthermia, at the transcriptional level, has been documented in mouse and rat primary neuronal cultures [10–12]. In particular, cultured rat hippocampal neurons were characterized by the absence of heat shock factor-1 (HSF1) [10,11], whereas cultured mouse motor neurons showed an impaired ability to activate HSF1 [12]. However, an *in vivo* study of the HSR in different cell populations of the brain has not been performed.

We have recently published an extensive and in-depth analysis of the HSR in the mouse [13] showing that the brain is able to maintain an efficient HSR throughout a mouse lifespan. This suggests that either the HSR is not compromised in adult neurons or that non-neuronal cell types are responsible for the seemingly static nature of the HSR during ageing. To distinguish these possibilities, we have now isolated neuronal and non-neuronal cells from the striata of mice in which the HSR had been chemically induced through HSP90 inhibition [13,14]. We have taken advantage of the BAC transgenic mice generated through the Gene Expression Nervous System Atlas (GENSAT) project, for which extensive characterization by the GENSAT project and others is available [15–17]. We have adopted an effective FACS protocol [18] to purify mature genetically labelled striatal projection neurons (GENSAT lines *Drd1a*-EGFP, *Drd2*-EGFP), astrocytes (*Aldh11*-EGFP) and oligodendrocytes (*Cmtm5*-EGFP), referred to herein as *Drd1a*, *Drd2*, *Astro* and *Oligo*, respectively. Using this technique, we demonstrate the ability of all four cell populations to induce HSR in adult mice upon treatment with the brain penetrant HSP90 inhibitor, HSP990 [13,14]. We also show the presence and relative abundance of HSR-related genes and proteins in different cell populations of the striatum. The identification of a competent HSR in neurons as well as glial populations supports the development of therapeutics that target the HSR pathway as treatments for neurodegenerative disorders.

## Results

### Differentiated neurons induce HSP genes upon HSP990 treatment

There is considerable evidence to suggest that the HSR is blunted in fully differentiated neurons as a consequence of the lack of either HSF1 expression [10,11] or HSF1 activation [12]. To test this *in vivo*, we studied the HSR in adult medium sized spiny neurons (MSNs) of the striatum, as well as astrocytes and oligodendrocytes, using HSP990, an HSP90 inhibitor [13,14], to determine the extent to which these different cell populations were able to mount a canonical HSR.

We treated 4 GENSAT BAC transgenic lines (*Drd1a*, *Drd2*, *Astro* and *Oligo*) and wild-type mice at 6 weeks of age ( $43 \pm 1$  days) with a single acute oral dose of HSP990 (12 mg/kg) and tissues were harvested two hours later. At this time post-dosing, we expect to detect the induction of HSP mRNAs, but it is most likely too early to see increases in heat shock protein levels [13]. Each experiment included a total of 12–14 mice that were genotype and gender matched. In order to obtain the required number of GFP positive (GFP<sup>+</sup>) cells for mRNA analysis several experiments had to be performed for each line (S1 Table). Before pooling cells from different experiments, we used RT-qPCR on hippocampal mRNA to ensure that the level of heat shock protein induction was comparable between experiments and lines (S1A Fig).

Interestingly, all cell populations showed a clear induction of the three major heat shock protein genes, *Hspa1a/b* (HSP70) (7–15 fold), *Dnajb1* (HSP40) (~ 2.5 fold) and *Hspb1* (HSP25) (~ 3.5 fold), as assessed by RT-qPCR, and the fold induction was generally comparable between lines (Fig 1A). The identification of two housekeeping genes (*Atp5b* and *Gapdh*) that were stable across the cell populations allowed us, for the first time, to estimate the relative basal level of the HS-related genes using the vehicle treated samples. Interestingly, the levels of *Hspa1a/b* and *Dnaj1* were higher in oligodendrocytes than astrocytes and neurons, in which

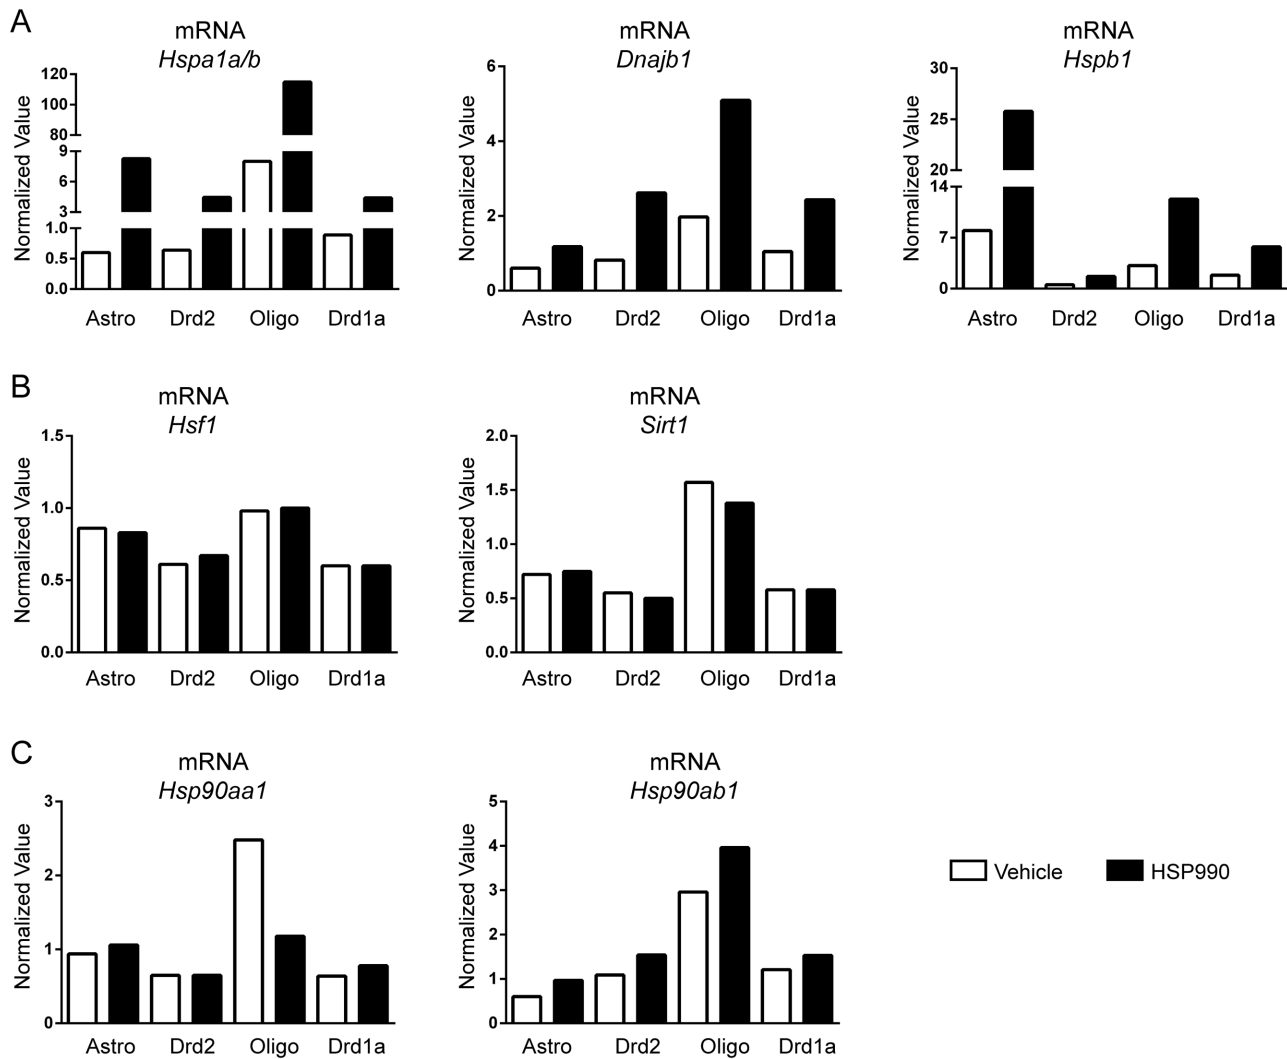

**Fig 1. mRNA expression level of HS related genes in different striatal cell populations.** Striatal cells were isolated from wild type and transgenic mice at 6 weeks of age 2 hours after treatment with HSP990 (12 mg/kg) or vehicle and sorted based on *Gfp* expression. RT-qPCR analysis of the expression levels of (A) *Hspa1a/b*, *Dnajb1* and *Hspb1* (B) *Hsf1* and *Sirt1* and (C) *Hsp90aa1* and *Hsp90ab1* in GFP<sup>+</sup> cells isolated from mice treated with HSP990 as compared to those treated with vehicle.

doi:10.1371/journal.pone.0131985.g001

they were comparable, whereas *Hspb1* was more abundant in astrocytes (Fig 1A). In keeping with previous data showing that the induction of the HSR does not elicit an up-regulation of HSF1 [13,19], the expression of *Hsf1* mRNA was not modulated by HSP990 in any of the cell populations (Fig 1B). Similarly, we found no effect of HSP990 on the expression of *Sirt1* (Fig 1B), a known positive regulator of HSF1 [20], consistent with our data from whole striatum [13]. The analysis of the two HSP90 isoforms, *Hsp90aa1* (inducible) and *Hsp90ab1* (constitutive), also matched the data obtained from whole striatum [13], with no induction for *Hsp90aa1* and a mild (~1.5 fold) up-regulation for *Hsp90ab1* that did not differ between neuronal and non-neuronal cells (Fig 1C). Once more, the basal levels of *Sirt1* and the two *Hsp90* isoforms were higher in oligodendrocytes.

In order to ensure cell purity, RT-qPCR was performed with markers specific for astrocytes (*Aldh1l1* and *Gfap*), oligodendrocytes (*Mbp*), neurons (*Slc12a5*) and MSNs of the direct (*Drd1a*) and indirect (*Drd2*) pathways (Fig 2). Neurons sorted from the *Drd1a* and *Drd2*

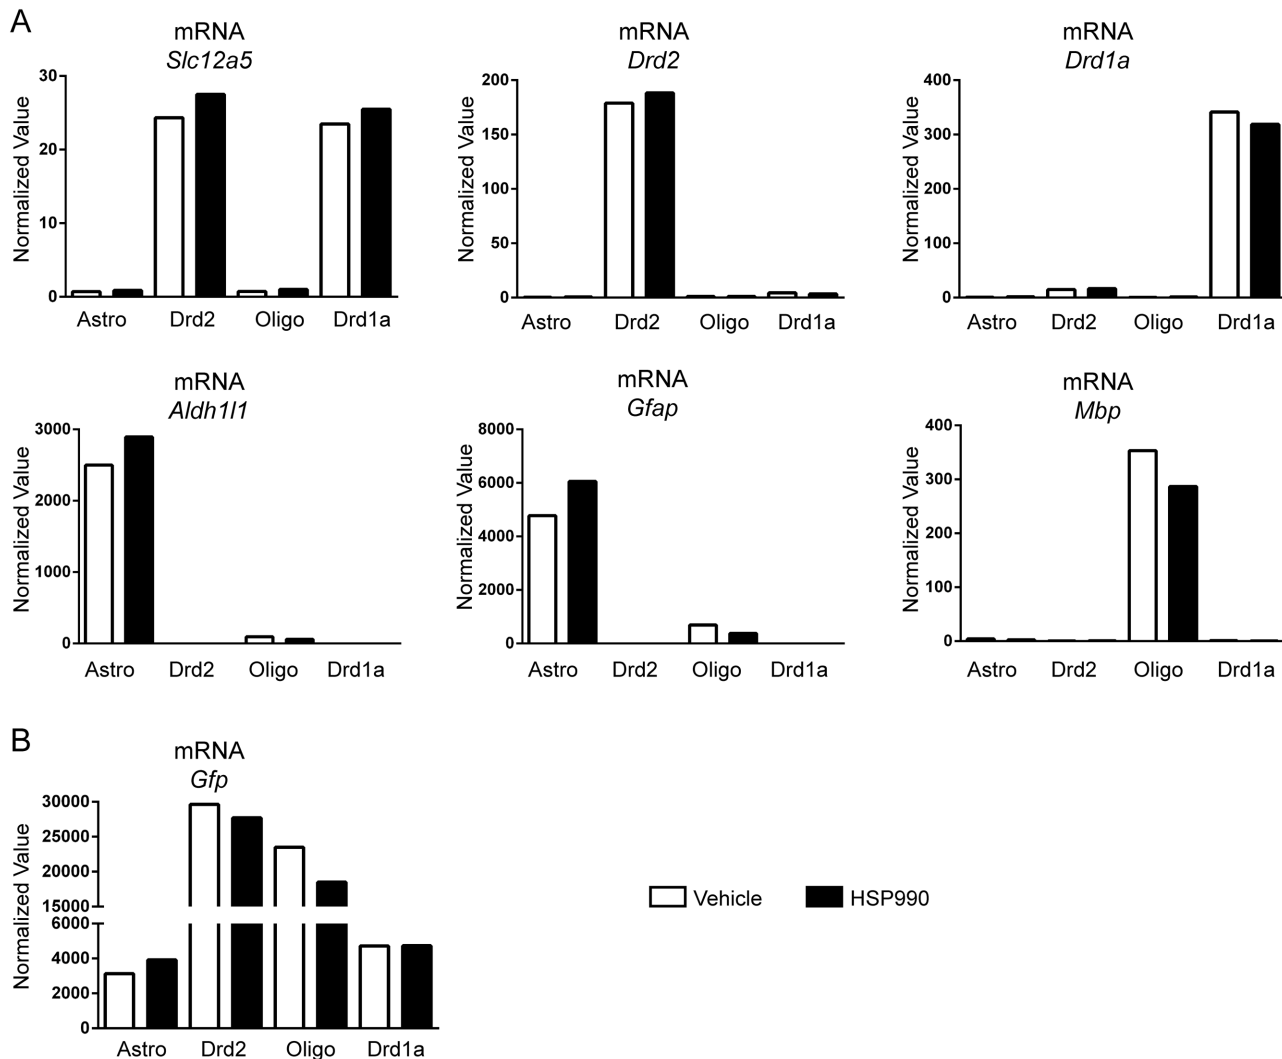

**Fig 2. Validation of the purity of the cell populations used for the mRNA analysis** Striatal cells were isolated from wild type and transgenic mice at 6 weeks of age 2 hours after treatment with HSP990 (12 mg/kg) or vehicle and sorted based on *Gfp* expression. RT-qPCR analysis of the expression levels of (A) *Slc12a5*, *Drd1a*, *Drd2*, *Aldh11l*, *Gfap* and *Mbp* and (B) *Gfp* in GFP<sup>+</sup> cells isolated from mice treated with HSP990 or vehicle.

doi:10.1371/journal.pone.0131985.g002

GENSAT lines showed no astrocyte or oligodendrocyte contamination and were specific for the expression of their respective dopamine receptor gene (Fig 2A). The cells sorted from the Astro line were free from neuronal or oligodendrocyte contamination. Surprisingly, those sorted from the Oligo line may have shown some astrocyte contamination based on the expression of *Gfap*. However, the fact that *Aldh11l* astrocyte marker was only detected at trace levels, may indicate that there was a low level of *Gfap* expression in the oligodendrocyte pool (Fig 2A). *Gfp* was expressed in all cell populations at levels reflecting the strength of the corresponding promoters (Fig 2B).

Taken together, these data show that fully differentiated MSNs of both the direct and indirect pathway of the striatum can trigger the induction of HSP gene expression upon HSP990 treatment. Furthermore, we were not able to detect any difference at the transcriptional level between the various cell populations of the striatum that could suggest a reduced performance of the HSR in adult neuronal cells as compared to non-neuronal cells.

## Comparative expression analysis of heat shock proteins in neuronal and non-neuronal striatal cells

The next challenge was to compare the levels of the heat shock proteins in the striatal cell populations. Preliminary experiments indicated that to detect the heat shock proteins on a western blot approximately 500,000 cells would need to be collected for each cell type. Cells were harvested for sorting at 2 hours post HSP90 dosing and the number of experiments performed as well as the total number of cells collected are summarised in [S1 Table](#). Our knowledge of the kinetics of the HSR from previous studies indicated that we would be unlikely to see induction of heat shock proteins at this time point, but we did expect to be able to compare basal levels. The collection of cells at a later time-point post-dosing was impractical due to the 5 hours required for the preparation and sorting on the cells from freshly collected tissue. As a control, before pooling cells from different experiments, we performed RT-qPCR on mRNA isolated from the hippocampus to ensure that the level of induction of HSP genes was comparable between mice ([S1B Fig](#)). In practice we were able to collect sufficient cells to detect HSP70 and HSP40, but not HSP25. As expected, we did not observe an upregulation of these chaperones ([Fig 3A](#)). Consistent with the mRNA data, the basal levels of HSP70, HSP40 and HSP90 were higher in oligodendrocytes ([Fig 3A](#)). Interestingly, SIRT1 and HSF1 were expressed in all cell populations and the levels of HSF1 mirrored the mRNA data. The HSF1 hypershift was not apparent, most likely because HSF1 had returned to its inactive state during the 5 hour preparation and sorting period ([Fig 3A](#)). As a control, to ensure that the dissociation and sorting protocol had not negatively affected heat shock protein induction, we performed western blot on protein extracted from snap frozen hippocampal tissue from each of the mice used for these experiments ([S2 Fig](#)). In keeping with the data obtained from GFP<sup>+</sup> sorted cells, induction of the heat shock proteins in the hippocampal tissue was not evident at the 2 hour time point, but a clear HSF1 hypershift was observed indicative of an active transcription factor [19]. Immunoprobings with NEUN and GFAP confirmed the purity of the astrocyte and neuronal populations, whilst the oligodendrocytes may either express GFAP or be contaminated with a low level of GFAP, consistent with the mRNA data ([Fig 3B](#)). All cell populations expressed GFP as expected ([Fig 3B](#)).

Taken together, these data suggest that the dynamics of translation of the HSR effectors follows the same kinetics in neuronal and non-neuronal cells of the striatum. Furthermore, this protein analysis confirms that the highest basal content of heat shock-related proteins occurs in oligodendrocytes, as was highlighted at the mRNA level. Surprisingly, the heat shock protein levels were considerably lower in astrocytes than either of the two neuronal populations.

## Discussion

The inability of mature neurons to mount a HSR [10–12] has been proposed as a critical mediator of the cell and tissue deterioration that is characteristic of neurodegenerative disorders [21]. However, whether the HSR is blunted in neurons *in vivo* had not been investigated. In the present study, we provide a detailed analysis of the HSR in multiple cell populations of the adult mouse striatum. In contrast to previous data from primary neuronal cultures [10–12], we were unable to detect an impairment of the HSR in striatal MSNs and could detect no difference in the extent to which the HSR was induced between neuronal and non-neuronal cells. Previous reports suggest that the failure to upregulate *Hspa1a/b* in hippocampal neurons was the result of the absence of HSF1 [10,11]. However, we found that in MSNs, HSF1 is expressed both at the mRNA and protein levels, although we cannot rule out that an absence of HSF1 may be specific of a hippocampal neuronal population. Overall, our data do not support a neuronal-specific blunting of the HSR in adult mice.

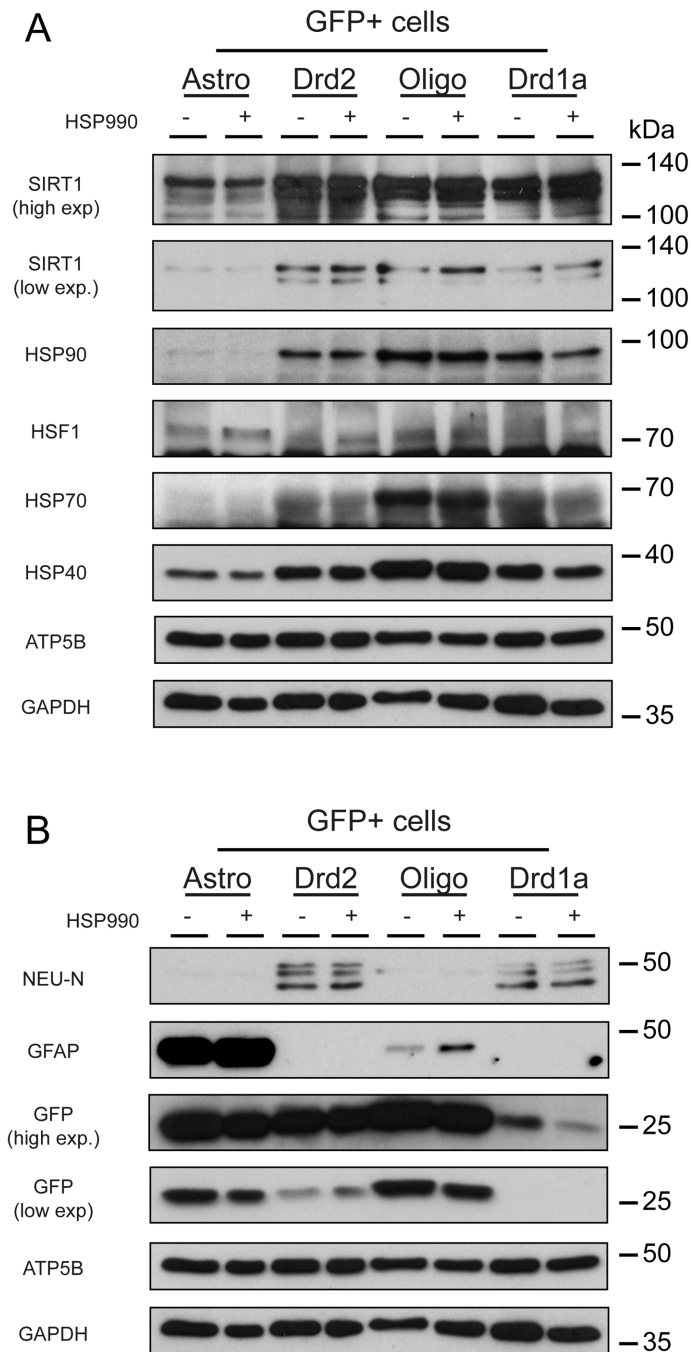

**Fig 3. Expression of the heat shock proteins and their regulators in the striatal cell populations** Striatal cells were isolated from wild type and transgenic mice at 6 weeks of age 2 hours after treatment with HSP990 (12 mg/kg) or vehicle and sorted based on GFP expression. Western blot analysis of the expression levels of (A) SIRT1, HSP90, HSF1, HSP70 and HSP40 and (B) NEUN, GFAP and GFP in GFP+ cells isolated from mice treated with HSP990 as compared to those treated with vehicle. Loading controls were ATP5B and GAPDH.

doi:10.1371/journal.pone.0131985.g003

Our study also showed that there was a marked difference in the relative cell-specific abundance of HS-related genes and proteins: oligodendrocytes showed the highest content of chaperones and HSR regulators, whereas these levels were considerably lower in astrocytes than in either of the two neuronal populations. Intriguingly, SIRT1 was also enriched in oligodendrocytes, whereas its levels were lowest in astrocytes. Despite the controversy on the role of SIRT1 in lifespan extension, its actions on substrates known to play key roles in cellular processes related to organismal health, suggest that SIRT1 might be a central player in the biology of cells and organisms [22,23].

We took advantage of the BAC transgenic mice generated through the GENSAT project [15] to provide a means by which striatal MSNs, astrocytes and oligodendrocytes could be sorted after HSR induction by the chemical inhibition of HSP90 with HSP990. Although an effective approach, this required the pooling of several experiments to generate sufficient cells, even for the RNA analysis. More recently genetically modified mouse lines that would provide a more efficient means of isolating cell-specific mRNAs have been described [24,25]. However, isolation of sufficient cells to perform a protein analysis still remains a major challenge.

To the best of our knowledge, this analysis of the HSR in different cell populations of the striatum provides the first comprehensive picture of this cellular process in mammals. The inability of the brain to deal with chronic proteotoxic stress in neurodegenerative conditions, such as Alzheimer's disease, Parkinson's disease and Huntington's disease, led to speculation that the HSR is compromised in adult neurons. Instead, we have shown that in mice, differentiated neurons are able to maintain an efficient HSR. Therefore, the development of new intervention strategies to improve the proteostasis capacity of the brain would be predicted to counteract the accumulation of misfolded proteins with beneficial consequences for neurodegenerative disorders.

## Materials and Methods

### Ethics Statement

All experimental procedures performed on mice were approved by the King's College London Ethical Review Process Committee and carried out under a Home Office License. Animals were sacrificed by cervical dislocation.

### Mouse models and maintenance

Swiss Webster mice were purchased from Harlan Olac, Bicester, UK (Hsd:ND4). The GENSAT lines [15] were obtained from the Mutant Mouse Regional Resource Centers (MMRRC) as follows: Tg(Drd1a-EGFP X60Gsat/Mmmh) (MMRRC stock #297) from the University of Missouri, Drd2-EGFP S118Gsat/Mmnc MMRRC stock #230 from the University of North Carolina, and Tg(Cmtm5-EGFP) DL108 Gsat/Mmucd MMRRC stock #10768 and Tg(Aldh1-11-EGFP) OFC789Gsat/Mmucd (MMRRC stock #11015) from the University of California Davis. Wild type and transgenic mice used in this study were littermates obtained by backcrossing to Swiss Webster mice. All animals were subject to a 12-hour light/12-hour dark cycle and had unlimited access to water and food. Housing conditions and environmental enrichment were as previously described [26]. Mouse striata were dissected and used fresh for each experiment; other brain regions, used for control experiments, were snap frozen in liquid nitrogen and stored at -80°C.

## NVP-HSP990 dosing

NVP-HSP990 [27,28] was obtained from Novartis Pharma AG and formulated with 0.2% methyl cellulose (Sigma, 274429) by brief sonication at high frequency and thorough mixing to form a uniform suspension. Compound or vehicle alone was freshly prepared for each round of treatment and administered to mice by oral gavage, with thorough mixing between dosing to ensure an even suspension. For all experiments, each treatment group contained age- and sex-matched mice and mice were weighed and dosed on the same day in the morning.

## Buffers and reagents for dissociation

HABGT: Hibernate-A (Brainbits, HA-pr) with 2% (vol/vol) B27 supplement (Invitrogen, 0080085SA), 0.25% Glutamax (Invitrogen, 35050038) and 5% Trehalose (Sigma, T-9531). Papain buffer: Hibernate-A minus Ca<sup>2+</sup> (Brainbits, HA-Ca) with 0.25% Glutamax. Papain and DNase (Worthington product codes PAP2 and D2, respectively) were distributed as lyophilized aliquots.

## Dissociation of striatal cell populations into single-cell suspensions

Cell dissociation was performed as previously described in detail [18] with the exception that HABGT was used instead of HABG. A single-cell suspension was achieved by trituration with a silanized, polished glass pipette. The suspension was then filtered and centrifuged through a BSA cushion for further purification.

## Flow cytometry

Cells were sorted according to their GFP content using a FACSAriaII (BD Bioscience) with an 85  $\mu\text{m}$  nozzle, at a frequency of 47.0 kHz. The 488 laser line was used for excitation. The FACS-Diva “4-way Purity” purity mode was used during sorting. Dead cells were gated out using high propidium iodide (Sigma, P-4864) staining and forward light scattered. Cell yield was about 10,000–30,000 GFP positive (GFP<sup>+</sup>) cells per mouse for the neuronal lines, 80,000–100,000 GFP<sup>+</sup> cells per mouse for the astrocyte line and 40,000–70,000 GFP<sup>+</sup> cells per mouse for the oligodendrocyte line.

## Taqman RT-qPCR

RNA extraction, cDNA synthesis, Taqman RT-qPCR and  $\Delta\text{Ct}$  analysis were performed as previously described [29]. The Taqman qPCR assays for *Gapdh*, *Atp5b*, *Rpl13a*, *Hsp90aa1* and *Hsp90ab1* were purchased from Primer Design. For a list of primers and probes for other assays see Carnemolla et al 2014 [13].

## SDS-PAGE and immunoblotting

Frozen mouse brain was homogenized in ice cold buffer (50 mM Tris-HCl pH 8.0, 150 mM NaCl, 10% Glycerol, 1% Triton X-100, 10 mM ethylenediaminetetraacetic acid (EDTA) supplemented with complete protease inhibitors (Roche, 11697498001) and phosphatase inhibitors (1 mM sodium orthovanadate [New England Biolabs, P0758S], 50 mM NaF [Sigma, 201154], 10 nM okadaic acid [Sigma, 08010]). Frozen cell pellets were resuspended in 5% sodium dodecyl sulphate (SDS) supplemented with protease and phosphatase inhibitors. Protein concentration was determined by the BCA assay (Thermo Scientific, 23223 and 23224), and 10–20  $\mu\text{g}$  protein for hippocampal tissue, or 4–8  $\mu\text{g}$  protein for the cell lysates was added to 2x Laemmli loading buffer before being subjected to SDS-polyacrylamide gel electrophoresis (PAGE) and western blotting as described previously [30]. Membranes were incubated with primary



antibody overnight at 4°C in phosphate buffer saline with 0.2% Tween (PBST) and 5% non-fat milk. Blots were washed 3 times for 5 min in PBST, incubated with secondary antibodies in PBST for 1 hour at RT, washed 3 times for 5 min in PBST, and exposed to ECL according to the manufacturer's recommendations (Amersham). Signal was developed using Amersham hyperfilm and a Xenograph developer. For full details on primary and secondary antibodies see Carnemolla et al. 2014 [13]. ATP5B and GAPDH antibodies were used as loading controls.

## Supporting Information

**S1 Checklist. NC3Rs ARRIVE Guidelines checklist**  
(PDF)

**S1 Fig. HSP gene induction in the hippocampi of mice used for the cell sorting experiments.** Hippocampal tissue was isolated from wild type and transgenic mice at 6 weeks of age 2 hours after treatment with HSP990 (12 mg/kg) or vehicle. RT-qPCR analysis of the expression levels of *Hspa1a/b*, *Dnajb1* and *Hspb1* in (A) tissue collected from mice used for the mRNA analysis (Fig 1) and (B) tissue collected from mice used for the protein analysis (Fig 3). Values were calculated relative to vehicle treated wild type mice. WT = wild type, Tg = transgenic. Error bars are SEM.

(TIF)

**S2 Fig. HS-related protein expression in the hippocampi of mice used for the cell sorting experiments.** Hippocampal tissue was isolated from wild type and transgenic mice at 6 weeks of age 2 hours after treatment with HSP990 (12 mg/kg) or vehicle. Western blot analysis of the expression levels of SIRT1, HSF1, HSP90, HSP70, HSP40, HSP25 and GFP in mice treated with HSP990 as compared to those treated with vehicle. It was possible to use GFP to confirm the genotypes of the mice used for the Astro and Oligo lines, but GFP was not expressed in the hippocampus of the neuronal lines and so could not be used for this purpose. Loading control = ATP5B. WT = wild type, Tg = transgenic. \*non-specific band.

(TIF)

**S1 Table. The total number of mice used to generate the number of GFP+ sorted cells that were pooled for the RNA and for the protein experiments.**  
(DOCX)

## Acknowledgments

We thank members of the Neurogenetics laboratory for help with breeding and genotyping mice and Thomas Hayday for help with FACS sorting.

## Author Contributions

Conceived and designed the experiments: AC GPB. Performed the experiments: AC HL. Analyzed the data: AC GPB. Contributed reagents/materials/analysis tools: SM. Wrote the paper: AC GPB.

## References

1. Patz JA, Campbell-Lendrum D, Holloway T, Foley JA (2005) Impact of regional climate change on human health. *Nature* 438: 310–317. PMID: [16292302](#)
2. Hall DM, Buettner GR, Oberley LW, Xu L, Matthes RD, Gisolfi CV (2001) Mechanisms of circulatory and intestinal barrier dysfunction during whole body hyperthermia. *Am J Physiol Heart Circ Physiol* 280: H509–521. PMID: [11158946](#)

3. Bouchama A, De Vol EB (2001) Acid-base alterations in heatstroke. *Intensive Care Med* 27: 680–685. PMID: [11398693](#)
4. Dhopes VP, Burns RA (1976) Letter: Loss of nerve conduction in heat stroke. *N Engl J Med* 294: 557–558.
5. Akerfelt M, Morimoto RI, Sistonen L (2010) Heat shock factors: integrators of cell stress, development and lifespan. *Nat Rev Mol Cell Biol* 11: 545–555. doi: [10.1038/nrm2938](#) PMID: [20628411](#)
6. Ron D, Walter P (2007) Signal integration in the endoplasmic reticulum unfolded protein response. *Nat Rev Mol Cell Biol* 8: 519–529. PMID: [17565364](#)
7. Haynes CM, Ron D (2010) The mitochondrial UPR—protecting organelle protein homeostasis. *J Cell Sci* 123: 3849–3855. doi: [10.1242/jcs.075119](#) PMID: [21048161](#)
8. Wang CH, Wu SB, Wu YT, Wei YH (2013) Oxidative stress response elicited by mitochondrial dysfunction: implication in the pathophysiology of aging. *Exp Biol Med* (Maywood) 238: 450–460.
9. Balch WE, Morimoto RI, Dillin A, Kelly JW (2008) Adapting proteostasis for disease intervention. *Science* 319: 916–919. doi: [10.1126/science.1141448](#) PMID: [18276881](#)
10. Marcuccilli CJ, Mathur SK, Morimoto RI, Miller RJ (1996) Regulatory differences in the stress response of hippocampal neurons and glial cells after heat shock. *J Neurosci* 16: 478–485. PMID: [8551332](#)
11. Kaamiranta K, Oksala N, Karjalainen HM, Suuronen T, Sistonen L, Helminen HJ, et al. (2002) Neuronal cells show regulatory differences in the hsp70 gene response. *Brain Res Mol Brain Res* 101: 136–140. PMID: [12007842](#)
12. Batulan Z, Shinder GA, Minotti S, He BP, Doroudchi MM, Nalbantoglu J, et al. (2003) High threshold for induction of the stress response in motor neurons is associated with failure to activate HSF1. *J Neurosci* 23: 5789–5798. PMID: [12843283](#)
13. Carnemolla A, Labbadia JP, Lazell H, Neueder A, Moussaoui S, Bates GP (2014) Contesting the dogma of an age-related heat shock response impairment: implications for cardiac-specific age-related disorders. *Hum Mol Genet* 23: 3641–3656. doi: [10.1093/hmg/ddu073](#) PMID: [24556212](#)
14. Labbadia J, Cunliffe H, Weiss A, Katsyuba E, Sathasivam K, Seredenina T, et al. (2011) Altered chromatin architecture underlies progressive impairment of the heat shock response in mouse models of Huntington disease. *J Clin Invest* 121: 3306–3319. doi: [10.1172/JCI57413](#) PMID: [21785217](#)
15. Gong S, Zheng C, Doughty ML, Losos K, Didkovsky N, Schambra UB, et al. (2003) A gene expression atlas of the central nervous system based on bacterial artificial chromosomes. *Nature* 425: 917–925. PMID: [14586460](#)
16. Lobo MK, Karsten SL, Gray M, Geschwind DH, Yang XW (2006) FACS-array profiling of striatal projection neuron subtypes in juvenile and adult mouse brains. *Nat Neurosci* 9: 443–452. PMID: [16491081](#)
17. Yang Y, Vidensky S, Jin L, Jie C, Lorenzini I, Frankl M, et al. (2011) Molecular comparison of GLT1+ and ALDH1L1+ astrocytes in vivo in astroglial reporter mice. *Glia* 59: 200–207. doi: [10.1002/glia.21089](#) PMID: [21046559](#)
18. Crook ZR, Housman DE (2012) Dysregulation of dopamine receptor D2 as a sensitive measure for Huntington disease pathology in model mice. *Proc Natl Acad Sci U S A* 109: 7487–7492. doi: [10.1073/pnas.1204542109](#) PMID: [22529362](#)
19. Sarge KD, Murphy SP, Morimoto RI (1993) Activation of heat shock gene transcription by heat shock factor 1 involves oligomerization, acquisition of DNA-binding activity, and nuclear localization and can occur in the absence of stress. *Mol Cell Biol* 13: 1392–1407. PMID: [8441385](#)
20. Westerheide SD, Anckar J, Stevens SM Jr, Sistonen L, Morimoto RI (2009) Stress-inducible regulation of heat shock factor 1 by the deacetylase SIRT1. *Science* 323: 1063–1066. doi: [10.1126/science.1165946](#) PMID: [19229036](#)
21. Tonkiss J, Calderwood SK (2005) Regulation of heat shock gene transcription in neuronal cells. *Int J Hyperthermia* 21: 433–444. PMID: [16048840](#)
22. Guarente L (2011) Sirtuins, aging, and metabolism. *Cold Spring Harb Symp Quant Biol* 76: 81–90. doi: [10.1101/sqb.2011.76.010629](#) PMID: [22114328](#)
23. Donmez G, Outeiro TF (2013) SIRT1 and SIRT2: emerging targets in neurodegeneration. *EMBO Mol Med* 5: 344–352. doi: [10.1002/emmm.201302451](#) PMID: [23417962](#)
24. Zhou P, Zhang Y, Ma Q, Gu F, Day DS, He A, et al. (2013) Interrogating translational efficiency and lineage-specific transcriptomes using ribosome affinity purification. *Proc Natl Acad Sci U S A* 110: 15395–15400. doi: [10.1073/pnas.1304124110](#) PMID: [24003143](#)
25. Gay L, Miller MR, Ventura PB, Devasthali V, Vue Z, Thompson HL, et al. (2013) Mouse TU tagging: a chemical/genetic intersectional method for purifying cell type-specific nascent RNA. *Genes Dev* 27: 98–115. doi: [10.1101/gad.205278.112](#) PMID: [23307870](#)

26. Hockly E, Woodman B, Mahal A, Lewis CM, Bates G (2003) Standardization and statistical approaches to therapeutic trials in the R6/2 mouse. *Brain Res Bull* 61: 469–479. PMID: [13679245](#)
27. Menezes DL, Taverna P, Jensen MR, Abrams T, Stuart D, Yu GK, et al. (2012) The novel oral Hsp90 inhibitor NVP-HSP990 exhibits potent and broad-spectrum antitumor activities in vitro and in vivo. *Mol Cancer Ther* 11: 730–739. doi: [10.1158/1535-7163.MCT-11-0667](#) PMID: [22246440](#)
28. Khong T, Spencer A (2011) Targeting HSP 90 induces apoptosis and inhibits critical survival and proliferation pathways in multiple myeloma. *Mol Cancer Ther* 10: 1909–1917. doi: [10.1158/1535-7163.MCT-11-0174](#) PMID: [21859842](#)
29. Benn CL, Fox H, Bates GP (2008) Optimisation of region-specific reference gene selection and relative gene expression analysis methods for pre-clinical trials of Huntington's disease. *Mol Neurodegener* 3: 17. doi: [10.1186/1750-1326-3-17](#) PMID: [18954449](#)
30. Landles C, Sathasivam K, Weiss A, Woodman B, Moffitt H, Finkbeiner S, et al. (2010) Proteolysis of mutant huntingtin produces an exon 1 fragment that accumulates as an aggregated protein in neuronal nuclei in Huntington disease. *J Biol Chem* 285: 8808–8823. doi: [10.1074/jbc.M109.075028](#) PMID: [20086007](#)
